# Supplementary material for: Safety of Red Blood Cell Transfusion Using Small Central Lines in Neonates: An in vitro Non-inferiority Study
Source: Front Pediatr. 2021 Mar 3;9:606611. doi: 10.3389/fped.2021.606611 (PMC7968454; doi:10.3389/fped.2021.606611)
Supplement: Supplementary file 3 [file Table_3.XLS]

## Sheet: Feuil1
Canton	Level	In your unit, do you use size 28G/1Fr PICC lines? (If you do not use PICC lines at all, you do not need to fill the rest of the form, answer only this question and submit) *	If possible give brand (s) of PICC lines used in your unit	In your unit, do you perform Red Blood Cells transfusion in neonates using 28G/1Fr PICC lines? (If you do not transfuse over PICC lines at all, you do not need to fill section 2, answer the next two questions and submit) *	Would you use 28G/1Fr PICC lines for blood transfusion if considered safe? *	In your unit, if you perform a RBC transfusion on a 28G/1Fr PICC line, do you remove PICC line after transfusion?	In your unit, after a RBC transfusion over a 28G/1Fr PICC line, do you make any kind of biological in quality control in the patient (i.e. hemolysis markers)	If you use a quality control after PICC line transfusion, please state which biological marker you use	In your unit, when performing a RBC transfusion over a 28G/1Fr PICC line, how often the catheter gets blocked before ending the transfusion?	When performing a RBC transfusion over a 28G/1Fr PICC line, have you experienced any other types of incidents related to the transfusion over the PICC line?	Please specify incidents observed following transfusion over a 28G/1Fr PICC line
A	III	Very Often	Vygon	Rarely	Yes	Mostly	No		never	never
B	III	Very Often	Vygon	Never	Yes
C	III	Very Often	Vygon	Rarely	No	Mostly	No		rarely	never
D	III	Very Often	Vygon	Never	No
E	III	Often	Premicath	Never	Yes
F	III	Very Often	Vygon	Never	Yes
G	III	Rarely	Vygon	Never	Yes
H	III	Very Often	Vygon	Rarely	Yes	Mostly	No		never	never
I	III	Very Often	Vygon	Rarely	Yes	Mostly	No		never	never
